# Supplementary material for: Briquet syndrome revisited: implications for functional neurological disorder
Source: PubMed Central journal article supplement — Brain Commun. 2020 Sep 23;2(2):fcaa156. doi: 10.1093/braincomms/fcaa156 (PMC7784044; doi:10.1093/braincomms/fcaa156), 2020-09-23
Supplement: fcaa156_supplementary_data.pdf [file fcaa156_supplementary_data.pdf]

**Supplementary Table 1. NIH Quality Assessment**

| First Author   | Year | Study                                                                                                                        | Quality Assessment |                  |                   |                                    |                     |                      |                  |                     |                           |                           |                   |                        |  |
|----------------|------|------------------------------------------------------------------------------------------------------------------------------|--------------------|------------------|-------------------|------------------------------------|---------------------|----------------------|------------------|---------------------|---------------------------|---------------------------|-------------------|------------------------|--|
|                |      |                                                                                                                              | Case-Controls      |                  |                   |                                    |                     |                      |                  |                     |                           |                           |                   |                        |  |
|                |      |                                                                                                                              | Research Question  | Study Population | Power Calculation | All Recruited from Same Population | Inclusion/Exclusion | Defined Case/Control | Random Selection | Concurrent Controls | Exposure prior to Outcome | Valid Exposure Assessment | Assessor Blinding | Analyses for Confounds |  |
| Battaglia      | 1998 | An investigation of the co-occurrence of panic and somatization disorders through temperamental variables                    | ✓                  | X                | X                 | X                                  | NR                  | X                    | NR               | NR                  | X                         | ✓                         | NR                | X                      |  |
| Brown          | 2005 | Dissociation, childhood interpersonal trauma, and family functioning in patients with somatization disorder                  | ✓                  | X                | X                 | X                                  | ✓                   | ✓                    | CD               | X                   | ✓                         | ✓                         | NR                | X                      |  |
| Brown          | 2014 | Trauma exposure and Axis I psychopathology: A cotwin control analysis in Norwegian young adults                              | ✓                  | ✓                | X                 | ✓                                  | ✓                   | ✓                    | NR               | ✓                   | ✓                         | ✓                         | NR                | ✓                      |  |
| Davoodi        | 2018 | Early maladaptive schemas in depression and somatization disorder                                                            | ✓                  | ✓                | X                 | ✓                                  | ✓                   | ✓                    | CD               | NR                  | ✓                         | ✓                         | NR                | ✓                      |  |
| Davoodi        | 2018 | Emotion regulation strategies in depression and somatization disorder                                                        | ✓                  | X                | X                 | ✓                                  | ✓                   | ✓                    | CD               | NR                  | ✓                         | ✓                         | NR                | ✓                      |  |
| Espirito-Santo | 2009 | Psychiatric symptoms and dissociation in conversion, somatization and dissociative disorders                                 | X                  | X                | X                 | ✓                                  | ✓                   | ✓                    | NR               | NR                  | X                         | ✓                         | X                 | X                      |  |
| Fayed          | 2011 | Brain dysfunction in fibromyalgia and somatization disorder using proton magnetic resonance spectroscopy: a controlled study | ✓                  | X                | X                 | X                                  | ✓                   | ✓                    | X                | NR                  | ✓                         | ✓                         | X                 | X                      |  |
| García Campayo | 2007 | P300 endogen evoked potentials in somatization disorder: a controlled study                                                  | ✓                  | X                | ✓                 | ✓                                  | ✓                   | ✓                    | NA               | NR                  | ✓                         | ✓                         | X                 | X                      |  |
| García Campayo | 2007 | Personality disorders in somatization disorder patients: A controlled study in Spain                                         | ✓                  | ✓                | ✓                 | ✓                                  | ✓                   | ✓                    | X                | X                   | X                         | ✓                         | ✓                 | X                      |  |
| Gelauff        | 2019 | The prognosis of functional limb weakness: a 14-year case-control study                                                      | ✓                  | ✓                | X                 | ✓                                  | ✓                   | ✓                    | X                | ✓                   | ✓                         | ✓                         | X                 | ✓                      |  |
| Guo            | 2017 | Anatomical distance affects cortical-subcortical connectivity in first-episode, drug-naive somatization disorder             | ✓                  | X                | X                 | X                                  | ✓                   | ✓                    | X                | NR                  | ✓                         | ✓                         | X                 | X                      |  |
| Guz            | 2004 | Conversion and somatization disorders: Dissociative symptoms and other characteristics                                       | X                  | ✓                | X                 | ✓                                  | ✓                   | ✓                    | NR               | NR                  | X                         | ✓                         | NR                | X                      |  |
| Hossain        | 2007 | Serum immunoglobulin profile in somatization disorder patients                                                               | ✓                  | X                | X                 | ✓                                  | ✓                   | X                    | ✓                | NR                  | ✓                         | ✓                         | X                 | X                      |  |

|          |      |                                                                                                                                                                             |   |   |   |   |   |   |    |    |   |   |    |   |
|----------|------|-----------------------------------------------------------------------------------------------------------------------------------------------------------------------------|---|---|---|---|---|---|----|----|---|---|----|---|
| Hossain  | 2007 | Serum level of copper, zinc and manganese in somatization disorder patients                                                                                                 | ✓ | X | X | ✓ | ✓ | X | ✓  | NR | ✓ | ✓ | X  | X |
| Kirpınar | 2015 | Somatization disorder and hypochondriasis: as like as two peas?                                                                                                             | ✓ | X | X | ✓ | ✓ | ✓ | NA | NR | X | ✓ | NR | X |
| Landa    | 2012 | Beyond the unexplainable pain: relational world of patients with somatization syndromes                                                                                     | ✓ | X | X | ✓ | ✓ | ✓ | X  | NR | ✓ | ✓ | X  | X |
| Li       | 2018 | Bidirectional causal connectivity in the cortico-limbic-cerebellar circuit related to structural alterations in first-episode, drug-naive somatization disorder             | ✓ | X | X | X | ✓ | ✓ | X  | NR | ✓ | ✓ | X  | ✓ |
| Mohlman  | 2004 | Distinguishing generalized anxiety disorder, panic disorder, and mixed anxiety states in older treatment-seeking adults                                                     | ✓ | ✓ | X | ✓ | ✓ | ✓ | NA | ✓  | X | ✓ | NR | X |
| Ou       | 2018 | Increased coherence-based regional homogeneity in resting-state patients with first-episode, drug-naive somatization disorder                                               | ✓ | X | X | X | ✓ | ✓ | X  | NR | ✓ | ✓ | X  | X |
| Padhy    | 2016 | Comparison of psychiatric morbidity in patients with irritable bowel syndrome and non-ulcer dyspepsia                                                                       | ✓ | X | X | ✓ | ✓ | ✓ | NR | ✓  | ✓ | ✓ | NR | ✓ |
| Pan      | 2019 | Voxel-based global-brain functional connectivity alterations in first-episode drug-naive patients with somatization disorder                                                | ✓ | X | X | X | ✓ | ✓ | X  | ✓  | ✓ | ✓ | X  | X |
| Rief     | 2001 | Immunological differences between patients with major depression and somatization syndrome                                                                                  | ✓ | X | X | ✓ | ✓ | ✓ | X  | NR | X | ✓ | X  | X |
| Rief     | 2003 | A new approach to the assessment of the treatment effects of somatoform disorders                                                                                           | ✓ | X | X | ✓ | ✓ | ✓ | X  | ✓  | X | ✓ | X  | X |
| Sanyal   | 1998 | Electro-dermal arousal and self-appraisal in patients with somatization disorder                                                                                            | ✓ | X | X | X | X | ✓ | X  | NR | X | ✓ | X  | X |
| Sertoz   | 2009 | Body image and self-esteem in somatizing patients                                                                                                                           | ✓ | ✓ | X | X | ✓ | ✓ | NR | X  | X | ✓ | NR | X |
| Song     | 2015 | Abnormal regional homogeneity and its correlations with personality in first-episode, treatment-naive somatization disorder                                                 | ✓ | X | X | X | ✓ | ✓ | X  | NR | ✓ | ✓ | X  | X |
| Spitzer  | 2008 | Childhood maltreatment in patients with somatization disorder                                                                                                               | ✓ | X | X | ✓ | ✓ | ✓ | X  | NR | ✓ | ✓ | NR | X |
| Spitzer  | 2009 | Complex post-traumatic stress disorder in patients with somatization disorder                                                                                               | ✓ | X | X | ✓ | ✓ | ✓ | X  | NR | ✓ | ✓ | NR | X |
| Stone    | 2010 | The symptom of functional weakness: a controlled study of 107 patients                                                                                                      | ✓ | ✓ | X | ✓ | ✓ | ✓ | X  | ✓  | ✓ | ✓ | X  | ✓ |
| Su       | 2014 | Dissociation of regional activity in default mode network in medication-naive, first-episode somatization disorder                                                          | ✓ | X | X | X | ✓ | ✓ | X  | NR | ✓ | ✓ | X  | X |
| Su       | 2015 | Increased functional connectivity strength of right inferior temporal gyrus in first-episode, drug-naive somatization disorder                                              | ✓ | X | X | X | ✓ | ✓ | X  | ✓  | ✓ | ✓ | X  | X |
| Su       | 2016 | Decreased interhemispheric functional connectivity in insula and angular gyrus/supramarginal gyrus: Significant findings in first-episode, drug-naive somatization disorder | ✓ | X | X | X | ✓ | ✓ | X  | NR | ✓ | ✓ | X  | ✓ |

|                             |      |                                                                                                                                                 |                          |                         |                           |                                           |                          |                                  |                             |                           |                             |                               |                          |                       |                               |
|-----------------------------|------|-------------------------------------------------------------------------------------------------------------------------------------------------|--------------------------|-------------------------|---------------------------|-------------------------------------------|--------------------------|----------------------------------|-----------------------------|---------------------------|-----------------------------|-------------------------------|--------------------------|-----------------------|-------------------------------|
| Taycan                      | 2014 | Trauma-related psychiatric comorbidity of somatization disorder among women in eastern Turkey                                                   | ✓                        | X                       | X                         | X                                         | ✓                        | ✓                                | ✓                           | NR                        | ✓                           | ✓                             | NR                       | X                     |                               |
| Wang                        | 2016 | Clinical significance of increased cerebellar default-mode network connectivity in resting-state patients with drug-naive somatization disorder | ✓                        | X                       | X                         | X                                         | ✓                        | ✓                                | X                           | NR                        | ✓                           | ✓                             | X                        | X                     |                               |
| Wei                         | 2016 | Abnormal default-mode network homogeneity and its correlations with personality in drug-naive somatization disorder at rest                     | ✓                        | X                       | X                         | X                                         | ✓                        | ✓                                | X                           | NR                        | ✓                           | ✓                             | X                        | ✓                     |                               |
| <b>Observational Cohort</b> |      |                                                                                                                                                 |                          |                         |                           |                                           |                          |                                  |                             |                           |                             |                               |                          |                       |                               |
|                             |      |                                                                                                                                                 | <b>Research Question</b> | <b>Study Population</b> | <b>Participation Rate</b> | <b>All Recruited from Same Population</b> | <b>Power Calculation</b> | <b>Exposure prior to Outcome</b> | <b>Sufficient Timeframe</b> | <b>Levels of Exposure</b> | <b>Repeated Assessments</b> | <b>Valid Outcome Measures</b> | <b>Assessor Blinding</b> | <b>Follow-up Rate</b> | <b>Analyses for Confounds</b> |
| Carey                       | 2003 | Trauma and posttraumatic stress disorder in an urban Xhosa primary care population: Prevalence, comorbidity, and service use patterns           | ✓                        | ✓                       | ✓                         | ✓                                         | X                        | ✓                                | ✓                           | ✓                         | X                           | ✓                             | ✓                        | NA                    | X                             |
| Chander                     | 2019 | The prevalence and its correlates of somatization disorder at a quaternary mental health centre                                                 | ✓                        | X                       | ✓                         | ✓                                         | ✓                        | ✓                                | NA                          | NA                        | X                           | ✓                             | NR                       | ✓                     | X                             |
| Epstein                     | 2016 | Insights into chronic functional movement disorders: the value of qualitative psychiatric interviews                                            | ✓                        | ✓                       | ✓                         | ✓                                         | X                        | ✓                                | NA                          | NA                        | X                           | X                             | X                        | ✓                     | X                             |
| Escobar                     | 1998 | DSM-IV hypochondriasis in primary care                                                                                                          | ✓                        | X                       | ✓                         | ✓                                         | X                        | ✓                                | ✓                           | NA                        | X                           | ✓                             | NA                       | ✓                     | X                             |
| Fink                        | 2002 | The prevalence of somatoform disorders among medical inpatients                                                                                 | ✓                        | ✓                       | ✓                         | ✓                                         | X                        | X                                | NA                          | NA                        | X                           | ✓                             | ✓                        | ✓                     | X                             |
| Fink                        | 2005 | Somatoform disorders among first-time referrals to a neurology service                                                                          | ✓                        | ✓                       | ✓                         | ✓                                         | X                        | X                                | NA                          | NA                        | X                           | ✓                             | NA                       | ✓                     | NA                            |
| Frosthalm                   | 2014 | Are illness perceptions related to future healthcare expenditure in patients with somatoform disorders?                                         | ✓                        | ✓                       | ✓                         | ✓                                         | X                        | ✓                                | ✓                           | ✓                         | X                           | ✓                             | NR                       | ✓                     | ✓                             |
| García-Campayo              | 2000 | SPECT scan in somatization disorder patients: an exploratory study of eleven cases                                                              | ✓                        | ✓                       | ✓                         | ✓                                         | X                        | ✓                                | ✓                           | NA                        | X                           | ✓                             | X                        | ✓                     | X                             |
| Hiller                      | 2000 | The DSM-IV nosology of chronic pain: a comparison of pain disorder and multiples somatization syndrome                                          | ✓                        | X                       | ✓                         | ✓                                         | X                        | ✓                                | ✓                           | ✓                         | X                           | ✓                             | NA                       | ✓                     | X                             |
| Interian                    | 2004 | The value of pseudoneurological symptoms for assessing psychopathology in primary care                                                          | ✓                        | X                       | X                         | ✓                                         | X                        | ✓                                | NA                          | ✓                         | X                           | ✓                             | X                        | ✓                     | ✓                             |
| Lynch                       | 1999 | Somatization in family practice: Comparing 5 methods of classification                                                                          | ✓                        | X                       | ✓                         | ✓                                         | X                        | NA                               | NA                          | NA                        | X                           | ✓                             | X                        | X                     | X                             |
| Manchikanti                 | 2007 | Psychological factors as predictors of opioid abuse and illicit drug use in chronic pain patients                                               | ✓                        | X                       | ✓                         | ✓                                         | X                        | ✓                                | ✓                           | ✓                         | NA                          | ✓                             | X                        | NA                    | X                             |
| Manchikanti                 | 2008 | Influence of psychological variables on the diagnosis of facet joint involvement in chronic spinal pain                                         | ✓                        | X                       | ✓                         | ✓                                         | X                        | ✓                                | ✓                           | X                         | NA                          | ✓                             | X                        | NA                    | X                             |

|           |      |                                                                                                                                              |   |   |    |    |   |    |    |    |   |   |    |    |   |
|-----------|------|----------------------------------------------------------------------------------------------------------------------------------------------|---|---|----|----|---|----|----|----|---|---|----|----|---|
| Marchetti | 2007 | Psychiatric diagnoses of patients with psychogenic non-epileptic seizures                                                                    | ✓ | ✓ | X  | ✓  | X | NA | NA | NA | X | ✓ | X  | ✓  | X |
| Miller    | 2001 | The association of irritable bowel syndrome and somatization disorder                                                                        | ✓ | X | ✓  | ✓  | X | ✓  | ✓  | NA | X | ✓ | NA | ✓  | X |
| North     | 2004 | The presentation of irritable bowel syndrome in the context of somatization disorder                                                         | ✓ | X | X  | ✓  | ✓ | ✓  | ✓  | NA | ✓ | ✓ | X  | X  | ✓ |
| Öztürk    | 2008 | Somatization as a predictor of suicidal ideation in dissociative disorders                                                                   | ✓ | ✓ | NR | NR | X | X  | X  | ✓  | X | ✓ | NR | NA | ✓ |
| Prerana   | 2017 | Somatization disorder: Are we moving towards an over-generalized and over-inclusive diagnosis in DSM-V?                                      | ✓ | ✓ | NR | ✓  | X | ✓  | NA | NA | X | ✓ | NA | ✓  | X |
| Schrag    | 2004 | The syndrome of fixed dystonia: an evaluation of 103 patients                                                                                | ✓ | X | X  | ✓  | X | ✓  | NA | NA | X | X | X  | ✓  | X |
| Simon     | 1999 | Stability of somatization disorder and somatization symptoms among primary care patients                                                     | ✓ | ✓ | ✓  | ✓  | X | ✓  | ✓  | NA | ✓ | ✓ | X  | ✓  | X |
| Smith     | 2005 | Exploration of DSM-IV criteria in primary care patients with medically unexplained symptoms                                                  | ✓ | ✓ | X  | ✓  | X | NA | NA | NA | X | ✓ | X  | ✓  | X |
| Weiss     | 2017 | Health care utilization in outpatients with somatoform disorders: Descriptives, interdiagnostic differences, and potential mediating factors | ✓ | X | ✓  | ✓  | X | ✓  | ✓  | NA | X | ✓ | NA | ✓  | ✓ |

### Controlled Intervention

|             |      |                                                                                                                                 | Randomized | Adequate Randomization | Concealed Allocation | Subject/ Provider Blinding | Assessor Blinding | Baseline Similarities | Overall Dropout Rate | Differential Dropout Rate | Adherence | Avoid Other Interventions | Valid Outcome Measures | Power Calculation | Prespecified Outcomes | Intent-to-Treat |
|-------------|------|---------------------------------------------------------------------------------------------------------------------------------|------------|------------------------|----------------------|----------------------------|-------------------|-----------------------|----------------------|---------------------------|-----------|---------------------------|------------------------|-------------------|-----------------------|-----------------|
| Allen       | 2006 | Cognitive-behavioral therapy for somatization disorder: A randomized controlled trial                                           | ✓          | ✓                      | ✓                    | X                          | ✓                 | ✓                     | ✓                    | ✓                         | ✓         | NR                        | ✓                      | X                 | ✓                     | ✓               |
| Bleichhardt | 2002 | Cognitive-behavioural therapy for patients with multiple somatoform symptoms—a randomised controlled trial in tertiary care     | ✓          | NR                     | NR                   | X                          | NR                | ✓                     | ✓                    | NR                        | NR        | NR                        | ✓                      | X                 | X                     | ✓               |
| Fjorback    | 2012 | Mindfulness therapy for somatization disorder and functional somatic syndromes — Randomized trial with one-year follow-up       | ✓          | ✓                      | ✓                    | X                          | NR                | ✓                     | ✓                    | ✓                         | ✓         | NR                        | ✓                      | ✓                 | ✓                     | ✓               |
| Hiller      | 2003 | A controlled treatment study of somatoform disorders including analysis of healthcare utilization and cost-effectiveness        | X          | NA                     | NA                   | X                          | NR                | X                     | ✓                    | NR                        | NA        | NR                        | ✓                      | X                 | X                     | X               |
| Martin      | 2007 | A one-session treatment for patients suffering from medically unexplained symptoms in primary care: A randomized clinical trial | ✓          | ✓                      | NR                   | X                          | NR                | X                     | ✓                    | ✓                         | ✓         | NR                        | ✓                      | X                 | ✓                     | ✓               |
| Schroder    | 2012 | Cognitive-behavioural group treatment for a range of functional somatic syndromes: randomised trial                             | ✓          | ✓                      | ✓                    | X                          | X                 | CD                    | X                    | ✓                         | ✓         | X                         | ✓                      | ✓                 | ✓                     | ✓               |

|                |      |                                                                                                                                                       |   |    |    |   |    |   |    |    |   |    |   |   |   |    |
|----------------|------|-------------------------------------------------------------------------------------------------------------------------------------------------------|---|----|----|---|----|---|----|----|---|----|---|---|---|----|
| Schroder       | 2013 | Cognitive behavioral therapy versus progressive muscle relaxation training for multiple somatoform symptoms: Results of a randomized controlled trial | ✓ | NR | NR | X | NR | ✓ | ✓  | ✓  | ✓ | X  | ✓ | ✓ | ✓ | ✓  |
| Van Ravesteijn | 2013 | Mindfulness-based cognitive therapy for patients with medically unexplained symptoms: A randomized controlled trial                                   | ✓ | ✓  | ✓  | X | NR | ✓ | ✓  | ✓  | ✓ | NR | ✓ | ✓ | ✓ | ✓  |
| Voon           | 2005 | Antidepressant treatment outcomes of psychogenic movement disorder                                                                                    | X | NA | NA | X | X  | X | NR | NR | X | X  | ✓ | X | X | NR |
| Zonneveld      | 2012 | Effective group training for patients with unexplained physical symptoms: A randomized controlled trial with a non-randomized one-year follow-up      | ✓ | ✓  | ✓  | X | NR | ✓ | ✓  | X  | ✓ | NR | ✓ | ✓ | ✓ | ✓  |

**Pre-Post No Control**

|       |      |                                                                                   | Research Question | Study Population | Representative Sample | Inclusion/Exclusion | Power Calculation | Consistent Intervention | Valid Outcome Measures | Assessor Blinding | Follow-up Rate | Statistical Analysis | Repeated Assessments | Individual-Level Outcomes |
|-------|------|-----------------------------------------------------------------------------------|-------------------|------------------|-----------------------|---------------------|-------------------|-------------------------|------------------------|-------------------|----------------|----------------------|----------------------|---------------------------|
| Allen | 2001 | Cognitive behavior therapy for somatization disorder: a preliminary investigation | ✓                 | X                | ✓                     | ✓                   | X                 | ✓                       | ✓                      | NR                | ✓              | ✓                    | ✓                    | NA                        |

**Case Series**

|          |      |                                                                                                 | Research Question | Study Population | Consecutive Cases | Comparable Subjects | Intervention | Valid Outcome Measures | Follow-up Length | Defined Statistical Methods | Clear Results |
|----------|------|-------------------------------------------------------------------------------------------------|-------------------|------------------|-------------------|---------------------|--------------|------------------------|------------------|-----------------------------|---------------|
| Kuwabara | 2007 | Diagnostic classification and demographic features in 283 patients with somatoform disorder     | X                 | ✓                | NR                | ✓                   | NA           | CD                     | NA               | X                           | ✓             |
| Morse    | 1997 | The meaning of symptoms in 10 women with somatization disorder and a history of childhood abuse | ✓                 | X                | NR                | ✓                   | NA           | ✓                      | NA               | ✓                           | ✓             |

**Abbreviations:** NR: Not reported; NA: Not applicable; CD: Cannot Determine.

**Supplementary Table 2. Summary of neuroimaging studies in DSM-IV somatization disorder.**

| Study                                                                                    | Participants                                       | Methods                                                                                                                                             | Results                                                                                                                                                                                   |
|------------------------------------------------------------------------------------------|----------------------------------------------------|-----------------------------------------------------------------------------------------------------------------------------------------------------|-------------------------------------------------------------------------------------------------------------------------------------------------------------------------------------------|
| <b>Su Q, et al. PLoS ONE. 2014; 9: e99273.</b>                                           | SD (n=25), 21<br>Female, 4 Male,<br>age=41.0±10.8  | Fractional amplitude of low frequency fluctuations (fALFF)                                                                                          | ↑ fALFF in the bilateral superior medial prefrontal cortex; ↓ fALFF in the left precuneus                                                                                                 |
| <b>Song Y, et al. International Journal of Psychophysiology. 2015; 97: 108–12.</b>       | HC (n=28), 22<br>Female, 6 Male,<br>age=38.7.0±9.6 | Regional homogeneity (ReHo) measures the synchronization of the time series of neighboring voxels                                                   | ↑ ReHo in the left angular gyrus                                                                                                                                                          |
| <b>Su Q, et al. Australian &amp; New Zealand Journal of Psychiatry. 2015; 49: 74–81.</b> |                                                    | Resting-state functional connectivity (rsFC) strength measured with graph theory                                                                    | ↑ rsFC strength in the right inferior temporal gyrus                                                                                                                                      |
| <b>Wei S, et al. Journal of Affective Disorders. 2016; 193: 81–8.</b>                    |                                                    | Network Homogeneity (NH) to detect specific loci of compromised connectivity and to study within network coherence                                  | ↑ NH in the left superior frontal gyrus; ↓ NH bilateral precuneus                                                                                                                         |
| <b>Wang H, et al. Medicine. 2016; 95: e4043.</b>                                         |                                                    | Seed-based functional connectivity method to measure cerebellar-based default mode network (DMN).<br>- Right Crus I<br>- Left Crus I<br>- Lobule IX | ↑ left/right Crus I-left/right angular gyrus connectivity;<br>↑ Lobule IX-left superior medial prefrontal cortex connectivity                                                             |
| <b>Su Q, et al. Psychiatry Research: Neuroimaging. 2016; 248: 48–54.</b>                 |                                                    | Voxel-mirrored Homotopic connectivity (VMHC) to examine interhemispheric changes                                                                    | ↓ VMHC in the angular gyrus/supramarginal gyrus and insula.                                                                                                                               |
| <b>Guo W, et al. Journal of Affective Disorders. 2017; 217: 153–8.</b>                   |                                                    | Examining short and long-range rsFC                                                                                                                 | ↑ short-range rsFC in the right superior frontal gyrus and ↓ short-range rsFC in the left pallidum; ↑ long-range rsFC in the left middle frontal gyrus and right inferior temporal gyrus. |

|                                                                                                          |                                                                                                                                                                         |                                                                                                                     |                                                                                                                                                                                                                                              |
|----------------------------------------------------------------------------------------------------------|-------------------------------------------------------------------------------------------------------------------------------------------------------------------------|---------------------------------------------------------------------------------------------------------------------|----------------------------------------------------------------------------------------------------------------------------------------------------------------------------------------------------------------------------------------------|
| <b>Ou Y, et al. <i>Journal of Affective Disorders</i>. 2018; 235: 150–4.</b>                             |                                                                                                                                                                         | Coherence based regional homogeneity (Cohe-ReHo) to detect abnormal regional synchronization                        | ↑ Cohe-ReHo in the left medial prefrontal cortex/anterior cingulate cortex                                                                                                                                                                   |
| <b>Li R, et al. <i>Front Psychiatry</i> 2018; 9: 162.</b>                                                |                                                                                                                                                                         | Granger causality analysis (GCA) were used to analyze causal connectivity of the cortico-limbic-cerebellar circuit. | GCA:<br>Bidirectional cortico-limbic-cerebellar connectivity abnormalities.                                                                                                                                                                  |
| <b>Pan P, et al. <i>J Affect Disord</i> 2019; 254: 82–9</b>                                              |                                                                                                                                                                         | Voxel-wise brain-wide rsFC alterations.                                                                             | ↑ Global rsFC in the right inferior temporal gyrus and left superior occipital gyrus; ↓ Global rsFC in the right insula                                                                                                                      |
| <b>Garcia-Campayo J, et al. <i>Australian and New Zealand Journal of Psychiatry</i> 2001; 35:359–363</b> | SD (n=11), 5<br>Female, 6 Male,<br>age=49.0±5.2                                                                                                                         | Single photon emission computed tomography scan (SPECT)                                                             | 4 patients had normal SPECT scans.<br><br>4 patients had hypoperfusion in the right cerebellum; 3 in the frontal and prefrontal area; 2 in the temporoparietal area; and only one subject had a complete hypoperfusion the right hemisphere. |
| <b>Fayed N, et al. <i>Acta Psychiatr Scand</i> 2012; 126: 115–25.</b>                                    | SD (n=10), 8<br>Female, 1 Male,<br>age=43.9±10<br><br>Fibromyalgia (n=10), 9<br>Female, 1 Male,<br>age=38.9±5.6<br><br>HC (n=10), 8<br>Female, 2 Male,<br>age=39.5±11.1 | MRI Spectroscopy. Brain metabolites measured in:<br>-Insula<br>-Hippocampus<br>-Posterior cingulate                 | Fibromyalgia and SD patients had ↑ levels of glutamate metabolites in the posterior cingulate but this finding did not remain statistically significant when comparing only SD and HCs.                                                      |

**Abbreviations.** fALFF: fractional amplitude of low frequency fluctuations; ReHo: regional homogeneity; rsFC: resting-state functional connectivity; DMN: default-mode-network; VMHC: voxel-mirrored homotopic connectivity; Cohe-ReHo: coherence based regional homogeneity; GCA: Granger causality analysis; GMV: gray matter volume; SPECT: single photon emission computed tomography scan; SD: somatization disorder; HC: healthy control; (↑) increase; (↓) decrease.

**Supplementary Table 3. Treatment Studies in DSM-IV Somatization Disorder.**

| Study                                       | Participants                                   | Methods                                                                                                                                                                                                                                                                                                                                                                                                                                                                                 | Results                                                                                                                                                                                                                                             | Strengths & Limitations                                                                                                                                                                 |
|---------------------------------------------|------------------------------------------------|-----------------------------------------------------------------------------------------------------------------------------------------------------------------------------------------------------------------------------------------------------------------------------------------------------------------------------------------------------------------------------------------------------------------------------------------------------------------------------------------|-----------------------------------------------------------------------------------------------------------------------------------------------------------------------------------------------------------------------------------------------------|-----------------------------------------------------------------------------------------------------------------------------------------------------------------------------------------|
| <b>DSM-IV Somatization Disorder Cohorts</b> |                                                |                                                                                                                                                                                                                                                                                                                                                                                                                                                                                         |                                                                                                                                                                                                                                                     |                                                                                                                                                                                         |
| <i>Allen et al., 2001</i>                   | DSM-IV somatization disorder (n=11; F=6; M=5)  | <p data-bbox="716 147 1031 326">Within-group design</p> <p data-bbox="716 261 1031 326">10-session weekly outpatient CBT</p> <p data-bbox="716 407 1031 618">Primary outcomes: physical discomfort scores (symptom diaries &amp; SSS) &amp; SF-36 physical functioning scores</p> <p data-bbox="716 699 1031 813">Secondary outcomes: depression (BDI), anxiety (BAI)</p> <p data-bbox="716 894 1031 1057">3 assessment timepoints: baseline, post-treatment, and 8-month follow-up</p> | <p data-bbox="1066 147 1577 245">Primary outcomes: less physical discomfort and improved physical functioning at each follow-up</p> <p data-bbox="1066 326 1577 391">Secondary outcomes: depression and anxiety also improved at each follow-up</p> | <p data-bbox="1625 147 1955 245">Strength: homogenous DSM-IV somatization disorder sample</p> <p data-bbox="1625 326 1955 391">Limitations: small sample size, no control condition</p> |
| <i>Allen et al., 2006</i>                   | DSM-IV somatization disorder (n=84; F=75; M=9) | <p data-bbox="716 1073 1031 1105">Between-groups design</p> <p data-bbox="716 1187 1031 1219">10-session (over ~3</p>                                                                                                                                                                                                                                                                                                                                                                   | <p data-bbox="1066 1073 1577 1170">Primary outcome: CBT+PCI arm showed greater reductions in CGI-SD severity scores vs. PCI-alone at all follow-up time</p>                                                                                         | <p data-bbox="1625 1073 1955 1138">Strength: large sample size with an active control arm</p>                                                                                           |



---

|                                                                                                                                                                                                                                                                                      |                                                                                                          |                                                                                    |
|--------------------------------------------------------------------------------------------------------------------------------------------------------------------------------------------------------------------------------------------------------------------------------------|----------------------------------------------------------------------------------------------------------|------------------------------------------------------------------------------------|
| <p>months) outpatient<br/>CBT+PCI (n=43) vs.<br/>PCI alone (n=41)</p> <p>Primary outcome:<br/>Somatization Severity<br/>(CGI-SD)</p> <p>Secondary outcomes:<br/>SF-36, Symptom<br/>Diaries and SSS</p> <p>4 assessment<br/>timepoints: baseline, 3-,<br/>9-, 15-month follow-ups</p> | <p>points</p> <p>Secondary outcomes: Physical<br/>functioning and somatic symptoms also<br/>improved</p> | <p>Limitation: limited<br/>generalizability due to lack<br/>of random sampling</p> |
|--------------------------------------------------------------------------------------------------------------------------------------------------------------------------------------------------------------------------------------------------------------------------------------|----------------------------------------------------------------------------------------------------------|------------------------------------------------------------------------------------|

---

|                                                                                                                                                             |                                                                                                                                                                                                                                                                                             |                                                                                                                                                                                                                                                 |                                                                                                                                                                                 |
|-------------------------------------------------------------------------------------------------------------------------------------------------------------|---------------------------------------------------------------------------------------------------------------------------------------------------------------------------------------------------------------------------------------------------------------------------------------------|-------------------------------------------------------------------------------------------------------------------------------------------------------------------------------------------------------------------------------------------------|---------------------------------------------------------------------------------------------------------------------------------------------------------------------------------|
| <p><b>Fjorback et al., 2012</b></p> <p>Bodily distress syndrome<br/>(n=119; F=95; M=24;<br/><br/>95% met DSM-IV criteria for<br/>somatization disorder)</p> | <p>Between-groups design</p> <p>Mindfulness therapy (8<br/>weekly sessions plus 1<br/>follow-up) (n=59) vs.<br/>enhanced treatment as<br/>usual with a psychiatric<br/>consultation (n=60)</p> <p>Primary outcome:<br/>change in physical<br/>component score (SF-<br/>36) at 15-months</p> | <p>Primary outcome: no difference between<br/>treatment arms</p> <p>Secondary outcomes: mindfulness vs.<br/>enhanced treatment as usual showed<br/>improved general health, health anxiety,<br/>physical symptoms, anxiety &amp; depression</p> | <p>Strengths: low drop-out rate,<br/>high attendance</p> <p>Limitations: only included<br/>subjects with severe and<br/>chronic symptoms and had<br/>low social functioning</p> |
|-------------------------------------------------------------------------------------------------------------------------------------------------------------|---------------------------------------------------------------------------------------------------------------------------------------------------------------------------------------------------------------------------------------------------------------------------------------------|-------------------------------------------------------------------------------------------------------------------------------------------------------------------------------------------------------------------------------------------------|---------------------------------------------------------------------------------------------------------------------------------------------------------------------------------|

---

Secondary outcomes:  
 other SF-36 domains,  
 WI, SCL-90-R-  
 somatization score;  
 SCL-8 depression and  
 anxiety

4 assessment  
 timepoints: baseline, 3-  
 9-, 15-month follow-ups

---

**Mixed Cohorts (Including DSM-IV Somatization Disorder)**

|                            |                                                                                                                 |                                                                                                                                      |                                                                                                        |                                                                   |
|----------------------------|-----------------------------------------------------------------------------------------------------------------|--------------------------------------------------------------------------------------------------------------------------------------|--------------------------------------------------------------------------------------------------------|-------------------------------------------------------------------|
| <b>Hiller et al., 2003</b> | Mixed SFD (n=172; F=118; M=54; 31% met criteria for DSM-IV somatization disorder)                               | Between- and within-groups design                                                                                                    | Primary outcome not specified                                                                          | Strength: use of other psychiatric and wait-list controls         |
|                            | Comparison group: other DSM-IV psychiatric diagnoses – predominately mood/anxiety disorders (n=123; F=77; M=46) | 15-20 hours of inpatient CBT-based therapy (mean treatment duration: 58.6 days for SFD; 52.2 days for comparison group)              | Both patient groups showed improvement over time but were not significantly different from one another | Limitations: primary outcome not specified, lack of randomization |
|                            | Wait-list (n=262); mean wait 135 days                                                                           | Outcome measures: SOMS, WI, Cognitions About Body and Health Questionnaire (CABAH), BDI, Dysfunctional Analysis Questionnaire (DAQ), | The wait-list group showed improvement in BDI scores only (note: wait-list did not complete SOMS)      |                                                                   |

---

---

Socioeconomic Status,  
Healthcare Utilization

3 assessment  
timepoints: pre, post, 2-  
year follow-up

---

**Rief et al.,  
2003**

Mixed SFD (n=325; F=215;  
M=110; 18% met criteria for  
DSM-IV somatization  
disorder)

Within-group design

Intensive inpatient  
treatment program  
(including individual  
and group CBT,  
relaxation training, and  
other interventions)  
(n=325)

Wait-list: subset of  
main SFD group (n=34)

Primary Outcomes:  
SOMS-7 Symptom  
Count and  
Somatization Severity

Primary outcome: subjects from the full  
group (n≥275 for each measure) showed  
a decrease in symptom count and  
somatization severity between admission  
and discharge

Wait-list subjects showed an increase in  
symptom count and somatization severity  
between pre-treatment wait and  
admission

Strengths: large sample  
size, use of a wait-list  
control, good reliability and  
validity of SOMS-7

Limitations: lack of  
comprehensive description  
of treatment(s)

---

**Bleichhardt  
et al. 2004**

Somatization syndrome  
(n=191; F=140; M=51; 28%  
met criteria for DSM-IV  
somatization disorder)

Between- and within-  
groups design

8-session inpatient

Primary outcome not specified

Both treatment arms showed  
improvement at discharge and 1-year

Strength: comparison of two  
relevant CBT-based  
treatments

---

---

|                                                                                                                                                                                                                                                                                                                                                                     |                                                          |                                                  |
|---------------------------------------------------------------------------------------------------------------------------------------------------------------------------------------------------------------------------------------------------------------------------------------------------------------------------------------------------------------------|----------------------------------------------------------|--------------------------------------------------|
| <p>CBT+symptom management training (n=107) vs. 8-session inpatient CBT+relaxation training (n=84) (mean treatment period for both groups: 51.9 days) vs. wait list (n=34) (mean wait: 128.1 days)</p> <p>Outcome measures: interview on illness behavior, SOMS, SCL-90-R, HADS, Questions on Life Satisfaction (FLZM), health-related quality of life (EuroQoL)</p> | <p>follow-up</p> <p>No significant group differences</p> | <p>Limitation: primary outcome not specified</p> |
|---------------------------------------------------------------------------------------------------------------------------------------------------------------------------------------------------------------------------------------------------------------------------------------------------------------------------------------------------------------------|----------------------------------------------------------|--------------------------------------------------|

---

|                                                                                                                                               |                                                                                                                                                                                                                             |                                                                                                                                                                                                                                                                                                                |                                                                                                                              |
|-----------------------------------------------------------------------------------------------------------------------------------------------|-----------------------------------------------------------------------------------------------------------------------------------------------------------------------------------------------------------------------------|----------------------------------------------------------------------------------------------------------------------------------------------------------------------------------------------------------------------------------------------------------------------------------------------------------------|------------------------------------------------------------------------------------------------------------------------------|
| <p><b>Martin et al., 2007</b></p> <p>Multiple somatoform symptoms (n=140; F=105; M=35; 12% met criteria for DSM-IV somatization disorder)</p> | <p>Between- and within-groups design</p> <p>1 small-group outpatient session (3-4 hours) of CBT (n=70) vs control (standard medical care) (n=70)</p> <p>Primary outcomes: healthcare utilization (outpatient visits and</p> | <p>Primary outcome: CBT group showed greater improvement over time in somatoform symptoms (BSI-somatization) and some aspects of healthcare utilization than the control group</p> <p>Secondary outcomes: both groups showed improvement for other outcomes but did not differ significantly across groups</p> | <p>Strengths: low dropout rate</p> <p>Limitations: modest number of DSM-IV somatization disorder limits generalizability</p> |
|-----------------------------------------------------------------------------------------------------------------------------------------------|-----------------------------------------------------------------------------------------------------------------------------------------------------------------------------------------------------------------------------|----------------------------------------------------------------------------------------------------------------------------------------------------------------------------------------------------------------------------------------------------------------------------------------------------------------|------------------------------------------------------------------------------------------------------------------------------|

---

---

medication) and somatoform symptoms (SOMS-7, WI, BSI-somatization)

Secondary outcomes: psychopathology severity (BDI, BSI-global severity index), sick-leave, health-related locus of control

3 assessment timepoints: baseline, 4-week and 6-month follow-ups

---

**Schroder et al., 2012**

Bodily distress syndrome (intent-to-treat n=120; F=95; M=25; 45% met criteria for DSM-IV somatization disorder)

Between- and within-groups design

9 sessions over 4 months (3.5 hour/session) CBT-based outpatient treatment (n=54) vs. enhanced usual care (letter to primary care doctors) (n=66)

Primary outcome: CBT group showed greater improvement over time than enhanced usual care

Secondary outcomes: CBT group showed greater improvement over time for every measure apart from the anxiety and depression severity score

Strengths: comprehensive CBT-based treatment

Limitations: only adults aged 20-45 were included, potentially limiting generalizability

---

Primary outcome:

---

---

mean change in  
aggregate score on  
SF-36 subscales over  
time

Secondary outcomes:  
SF-36, WI, SCL-90-R,  
SCL-8

4 assessment  
timepoints: baseline, 4-,  
10- and 16-month  
follow-ups

---

**Zonneveld et  
al., 2012**

Unexplained physical  
symptoms (undifferentiated  
somatoform disorder and/or  
chronic pain) (n=162  
enrolled; F=131; M=31;  
14.8% met criteria for DSM-  
IV somatization disorder)

Between- and within-  
groups design

20 CBT-based  
outpatient trainings  
over 13 weeks (n=84)  
vs wait-list control  
(n=72)

Primary outcomes: SF-  
36 physical and mental  
component summaries

Secondary outcomes:

---

Primary outcomes: the intervention group  
showed greater improvement from  
baseline to 13-weeks than the control  
group in the physical, but not the mental  
health score.

Secondary outcomes: the intervention  
group showed greater improvement from  
baseline to 13-weeks than the control  
group in somatization, physical  
functioning, social functioning, and  
general health

Strength: well-defined  
treatment

Limitations: modest number  
of DSM-IV somatization  
disorder limits  
generalizability

---

other SF-36 scales,  
SCL-90-R

2 assessment  
timepoints for both  
groups: baseline, 13  
weeks after baseline

2 additional  
assessment timepoints  
for intervention group:  
3- and 12-month follow-  
ups

---

**Schroder et  
al., 2013**

Multiple somatoform  
symptoms (intent-to-treat  
n=134; F=103; M=31; 11.2%  
met criteria for DSM-IV  
somatization disorder)

Between- and within-  
groups design

8-week CBT (n=49) vs.  
8-week progressive  
muscle relaxation  
(n=41) vs wait-list  
control (n=43) (all  
outpatient)

Primary outcome:  
SOMS-7

Secondary outcomes:

---

Both intervention groups showed  
improvement over time for most  
measures

CBT group showed better treatment  
effects in SOMS-7 severity and symptom  
count and SF-12 mental well-being than  
wait-list control

No significant differences in treatment  
effects between CBT and progressive  
muscle relaxation or between progressive  
muscle relaxation and wait-list controls.

Strengths: comparison of  
two relevant CBT-based  
treatments, use of wait-list  
control

Limitations: modest number  
of DSM-IV somatization  
disorder limits  
generalizability

---

mental and physical health (SF-12, HADS), healthcare utilization

3 assessment timepoints: baseline, 3- and 6-month follow-ups

---

**Van Ravesteijn et al., 2013**

Medically unexplained symptoms (n=125; F=94; M=31; 13% met criteria for DSM-IV somatization disorder)

Between- and within-groups design

8 weeks of outpatient mindfulness group therapy and at-home practice + enhanced usual care (n=64) vs enhanced usual care only (control) (n=61)

Primary outcome: no difference between mindfulness treatment and control groups

Secondary outcomes: the mindfulness group showed improvement in somatization symptoms (PHQ-15) at the end of treatment and the 9-month follow-up. The control showed no improvement.

Strength: well-defined treatment

Limitations: modest number of DSM-IV somatization disorder limits generalizability

Primary outcome: general health status (EuroQoL) compared at the end of treatment

Secondary outcomes: mental and physical health (SF-36, PHQ-15, PHQ-9, WI), mindfulness (Five Facet Mindfulness

---



---

Questionnaire),  
Healthcare Utilization

3 assessment  
timepoints: baseline,  
post-treatment, 9-  
month follow-up

---

**Abbreviations:** CBT, Cognitive Behavioral Therapy; SFD, somatoform disorder; F, female; M, male; SSS, Severity of Somatic Symptoms scale; SF-36, 36-item Short-Form Health Survey; SF-12, 12-item Short-Form Health Survey; BDI, Beck Depression Inventory; BAI, Beck Anxiety Inventory; PCI, Psychiatric Consultation Intervention; CGI-SD, Clinical Global Impression for Somatization Disorder; WI, Whiteley Index; SCL-8, Symptom Checklist-8; SCL-90-R, Symptom Checklist-90-Revised; DSM, Diagnostic and Statistics Manual; SOMS, Screening for Somatoform Symptoms; BSI, Brief Symptoms Inventory; HADS, Hospital Anxiety and Depression Scale; PHQ, Patient Health Questionnaire

---
